# Supplementary material for: Chinese natural compound decreases pacemaking of rabbit cardiac sinoatrial cells by targeting second messenger regulation of f-channels
Source: eLife. 2022 Mar 22;11:e75119. doi: 10.7554/eLife.75119 (PMC8940175; doi:10.7554/eLife.75119)
Supplement: Figure 1—source data 1. [file elife-75119-fig1-data1.xlsx]

## Sheet: rate panel B
TMYX concentration (mg/ml)	Mean±SEM of TMYX effect (%)	Groups compared		Statistic test	DF	P-value	t value
0.2	-6.34±1.21	Ctrl	TMYX	Paired Sample t Test	6	0.01143	3.59539
0.6	-8.23±0.90	Ctrl	TMYX	Paired Sample t Test	10	2.62912e-06	9.46334
2	-20.78±1.64	Ctrl	TMYX	Paired Sample t Test	11	4.46235e-07	10.5159
5	-47.13±6.58	Ctrl	TMYX	Paired Sample t Test	6	0.0027	4.90246
6	-50.23±6.53	Ctrl	TMYX	Paired Sample t Test	7	0.000153238	7.3704
20	-82.96±4.28	Ctrl	TMYX	Paired Sample t Test	16	1.23101e-12	19.6757
60	-86.72±6.31	Ctrl	TMYX	Paired Sample t Test	5	0.0003922	8.39842

## Sheet:  EDD panel C
TMYX concentration (mg/ml)	Mean±SEM of TMYX effect (Normalized)	Groups compared		Statistic test	DF	P-value	t value
0.2	0.9±0.02	Ctrl	TMYX	Paired Sample t Test	6	0.00666	4.05889
0.6	0.87±0.04	Ctrl	TMYX	Paired Sample t Test	10	0.0021	4.11194
2	0.5±0.04	Ctrl	TMYX	Paired Sample t Test	11	2.33594e-08	14.0085
6	0.24±0.06	Ctrl	TMYX	Paired Sample t Test	7	4.20565e-07	17.8926

## Sheet: APD panel C
TMYX concentration (mg/ml)	Mean±SEM of TMYX effect (Normalized)	Groups compared		Statistic test	DF	P-value	t value
0.2	1.02±0.02	Ctrl	TMYX	Paired Sample t Test	6	0.09641	-1.96952
0.6	1.06±0.01	Ctrl	TMYX	Paired Sample t Test	10	0.000123909	-6.04817
2	1.09±0.01	Ctrl	TMYX	Paired Sample t Test	11	4.30897e-06	-8.35574
6	1.17±0.04	Ctrl	TMYX	Paired Sample t Test	7	0.00676	-3.79476

## Sheet: MDP panel C
TMYX concentration (mg/ml)	Mean±SEM of TMYX effect (Normalized)	Groups compared		Statistic test	DF	P-value	t value
0.2	0.99±0.005	Ctrl	TMYX	Paired Sample t Test	6	0.08102	-2.09518
0.6	1±0.01	Ctrl	TMYX	Paired Sample t Test	10	0.89516	0.13516
2	1.01±0.01	Ctrl	TMYX	Paired Sample t Test	11	0.17808	1.43867
6	0.97±0.01	Ctrl	TMYX	Paired Sample t Test	7	0.09179	-1.95279

## Sheet: TOP panel C
TMYX concentration (mg/ml)	Mean±SEM of TMYX effect (Normalized)	Groups compared		Statistic test	DF	P-value	t value
0.2	0.98±0.02	Ctrl	TMYX	Paired Sample t Test	6	0.1976	-1.44865
0.6	1.01±0.01	Ctrl	TMYX	Paired Sample t Test	10	0.27539	1.15385
2	0.99±0.01	Ctrl	TMYX	Paired Sample t Test	11	0.20066	-1.36127
6	0.93±0.04	Ctrl	TMYX	Paired Sample t Test	7	0.0842	-2.01135
