# Supplementary material for: Chinese natural compound decreases pacemaking of rabbit cardiac sinoatrial cells by targeting second messenger regulation of f-channels
Source: eLife. 2022 Mar 22;11:e75119. doi: 10.7554/eLife.75119 (PMC8940175; doi:10.7554/eLife.75119)
Supplement: Figure 2—figure supplement 1—source data 1. [file elife-75119-fig2-figsupp1-data1.xlsx]

## Sheet: Sheet1
V1/2 (mV) panel B		Inverse slope factor (mV) panel B
Control	TMYX	Control	TMYX
-56.39	-63.12	7.87	9.16
Curves compared		Statistic test	F value	DF	P Value
Control	TMYX	Extra Sum-of- Squares F-test	95.61	41, 46	P<0.0001
Reversal Potential (mV) panel C		Slope (pA/pF)/mV panel C
Control	TMYX	Control	TMYX
-15.6	-16.8	0.43	0.47
Curves compared		Statistic test	F value	P Value
Control	TMYX	Linear Regression Analysis Test	33.3556	<0.0001
