# Supplementary material for: Chinese natural compound decreases pacemaking of rabbit cardiac sinoatrial cells by targeting second messenger regulation of f-channels
Source: eLife. 2022 Mar 22;11:e75119. doi: 10.7554/eLife.75119 (PMC8940175; doi:10.7554/eLife.75119)
Supplement: Figure 2—figure supplement 2—source data 1. [file elife-75119-fig2-figsupp2-data1.xlsx]

## Sheet: Sheet 1
	a (pA/pF)/mV		b (mV)		V1/2 (mV)		s
	Control	TMYX	Control	TMYX	Control	TMYX	Control	TMYX
Mean values	0.339	0.394	7.663	7.296	-51.38	-64.33	10.23	11.51
