# Supplementary material for: Chinese natural compound decreases pacemaking of rabbit cardiac sinoatrial cells by targeting second messenger regulation of f-channels
Source: eLife. 2022 Mar 22;11:e75119. doi: 10.7554/eLife.75119 (PMC8940175; doi:10.7554/eLife.75119)
Supplement: Figure 2—source data 1. [file elife-75119-fig2-data1.xlsx]

## Sheet: Sheet1
V1/2 (mV) panel B		Inverse slope factor (mV) panel B
Control	TMYX	Control	TMYX
-57.3	-69.2	9.8	11.3
Curves compared		Statistic test	F value	DF	P Value
Control	TMYX	Extra Sum-of- Squares F-test	25.53	54, 54	<0.0001
Reversal Potential (mV) panel C		Slope (pA/pF)/mV panel C
Control	TMYX	Control	TMYX
-13.6	-12.7	0.328	0.389
Curves compared		Statistic test	F	P Value
Control	TMYX	Linear Regression Analysis Test	124.379	<0.0001
