# Supplementary material for: Chinese natural compound decreases pacemaking of rabbit cardiac sinoatrial cells by targeting second messenger regulation of f-channels
Source: eLife. 2022 Mar 22;11:e75119. doi: 10.7554/eLife.75119 (PMC8940175; doi:10.7554/eLife.75119)
Supplement: Figure 3—figure supplement 1—source data 1. [file elife-75119-fig3-figsupp1-data1.xlsx]

## Sheet: Current
Groups compared (panel B) Current reduction %		Statistic test	DF	P-value	t value
TMYX 38.1±3.5	TMYX + DPCPX 43.6±5.2	Paired Sample t Test	5	0.11142	1.93052
