# Supplementary material for: Chinese natural compound decreases pacemaking of rabbit cardiac sinoatrial cells by targeting second messenger regulation of f-channels
Source: eLife. 2022 Mar 22;11:e75119. doi: 10.7554/eLife.75119 (PMC8940175; doi:10.7554/eLife.75119)
Supplement: Figure 3—figure supplement 2—source data 1. [file elife-75119-fig3-figsupp2-data1.xlsx]

## Sheet: Sheet1
Means Comparison (Fisher test) panel B		Statistic test	DF	P-value	t-value
Control	TMYX	Fisher test	18	6.14857e-06	6.2987
Control	H-89	Fisher test	18	0.03468	2.28481
Control	H-89+TMYX	Fisher test	18	2.5533e-07	7.97696
TMYX	H-89	Fisher test	18	0.000814251	4.01389
TMYX	H-89+TMYX	Fisher test	18	0.11057	1.67828
H-89	H-89+TMYX	Fisher test	18	2.1298e-05	5.69217
