# Supplementary material for: Chinese natural compound decreases pacemaking of rabbit cardiac sinoatrial cells by targeting second messenger regulation of f-channels
Source: eLife. 2022 Mar 22;11:e75119. doi: 10.7554/eLife.75119 (PMC8940175; doi:10.7554/eLife.75119)
Supplement: Figure 3—source data 1. [file elife-75119-fig3-data1.xlsx]

## Sheet: Current
Groups compared Current reduction %		Statistic test	DF	P-value	t value
TMYX 34.6±4.9	TMYX+Atropine 33.5±3.4	Paired Sample t Test	6	0.59384	0.56299
Ach 54.7±4.0	Ach+Atropine 1.2±6.9	Paired Sample t Test	5	0.000673631	7.48225

## Sheet: Rate
Groups compared Rate reduction %		Statistic test	DF	P-value	t value
TMYX 42.6±5.8	TMYX + Atropine 37.6±4.8	Paired Sample t Test	5	0.80745	-0.25695
Ach 71.5±3.6	Ach + Atropine -1.0±1.6	Paired Sample t Test	6	1.62137e-05	-12.4752
