# Supplementary material for: Chinese natural compound decreases pacemaking of rabbit cardiac sinoatrial cells by targeting second messenger regulation of f-channels
Source: eLife. 2022 Mar 22;11:e75119. doi: 10.7554/eLife.75119 (PMC8940175; doi:10.7554/eLife.75119)
Supplement: Figure 4—figure supplement 1—source data 1. [file elife-75119-fig4-figsupp1-data1.xlsx]

## Sheet: Sheet 1
Groups compared (panel A)			Statistic test	DF	P-value	F value
Basal 49.09±3.0	IBMX 33.36±3.45	IBMX + cAMP 24.35±2.75	Anova OneWay	2	4.61324e-05	15.0208
Means Comparison (Fisher test)		Statistic test	P-value	t value
Basal	IBMX	Fisher test	0.00146	3.55911
Basal	IBMX + cAMP	Fisher test	3.17334e-05	5.02172
Groups compared (panel B)				Statistic test	DF	P-value	F value
Basal 49.09±3.0	Forsk 35.92±3.31	Forsk + cAMP 28.47±4.91	Forsk + cAMP +IBMX 9.37±3.41	Anova OneWay	3	3.3051e-11	55.6607
Means Comparison (Fisher test)		Statistic test	P-value	t value
Basal	Forsk	Fisher test	8.65147e-06	-5.56747
Basal	Forsk + cAMP	Fisher test	1.08962e-06	-6.38951
Basal	Forsk + cAMP + IBMX	Fisher test	4.76128e-12	-12.2318
