# Supplementary material for: Chinese natural compound decreases pacemaking of rabbit cardiac sinoatrial cells by targeting second messenger regulation of f-channels
Source: eLife. 2022 Mar 22;11:e75119. doi: 10.7554/eLife.75119 (PMC8940175; doi:10.7554/eLife.75119)
Supplement: Figure 4—source data 1. [file elife-75119-fig4-data1.xlsx]

## Sheet: Sheet 1
Groups compared (panel B)			Statistic test	DF	P-value	F value
TMYX Basal cAMP 49.1±3.0	TMYX + cAMP 10µM 37.9±5.1	TMYX + cAMP 100µM 2.3±3.3	ANOVA OneWay	26	4.20616e-08	37.4149
Means Comparison (Fisher test)		Statistic test	P-value	t-value
TMYX Basal cAMP	TMYX + cAMP 10 µM	Fisher test	0.04888	-2.07498
TMYX Basal cAMP	TMYX + cAMP 100µM	Fisher test	7.85976e-09	-8.64065
TMYX + cAMP 10µM	TMYX + cAMP 100µM	Fisher test	1.19899e-05	-5.49323
