# Supplementary material for: Chinese natural compound decreases pacemaking of rabbit cardiac sinoatrial cells by targeting second messenger regulation of f-channels
Source: eLife. 2022 Mar 22;11:e75119. doi: 10.7554/eLife.75119 (PMC8940175; doi:10.7554/eLife.75119)
Supplement: Figure 5—figure supplement 1—source data 1. [file elife-75119-fig5-figsupp1-data1.xlsx]

## Sheet: Sheet1
Groups compared Panel D V1/2 (mV)		Statistic test	DF	P-value	t value
Control -113.51±1.04	TMYX -112.38±2.26	Paired Sample t Test	3	0.45137	-0.86351
Groups compared Panel D gMAX (nS)		Statistic test	DF	P-value	t value
Control 0.71±0.21	TMYX 0.69±0.19	Paired Sample t Test	3	0.5276	0.71245
