# Supplementary material for: Chinese natural compound decreases pacemaking of rabbit cardiac sinoatrial cells by targeting second messenger regulation of f-channels
Source: eLife. 2022 Mar 22;11:e75119. doi: 10.7554/eLife.75119 (PMC8940175; doi:10.7554/eLife.75119)
Supplement: Figure 5—source data 1. [file elife-75119-fig5-data1.xlsx]

## Sheet: Sheet1
	k (µM) (panel B)		h (panel B)
	cAMP/Cont	(cAMP + TMYX)/Cont	cAMP/Cont	(cAMP + TMYX )/Cont
Mean ± SEM	1.17	5.66	1.3	0.94
